# Supplementary material for: Transcriptome Network Analysis Reveals Aging-Related Mitochondrial and Proteasomal Dysfunction and Immune Activation in Human Thyroid
Source: PubMed Central journal article supplement — Thyroid. 2018 May 1;28(5):656–66. doi: 10.1089/thy.2017.0359 (PMC5952342; doi:10.1089/thy.2017.0359), 2018-05-01
Supplement: Supp_Fig1.pdf [file Supp_Fig1.pdf]

## Supplementary Data

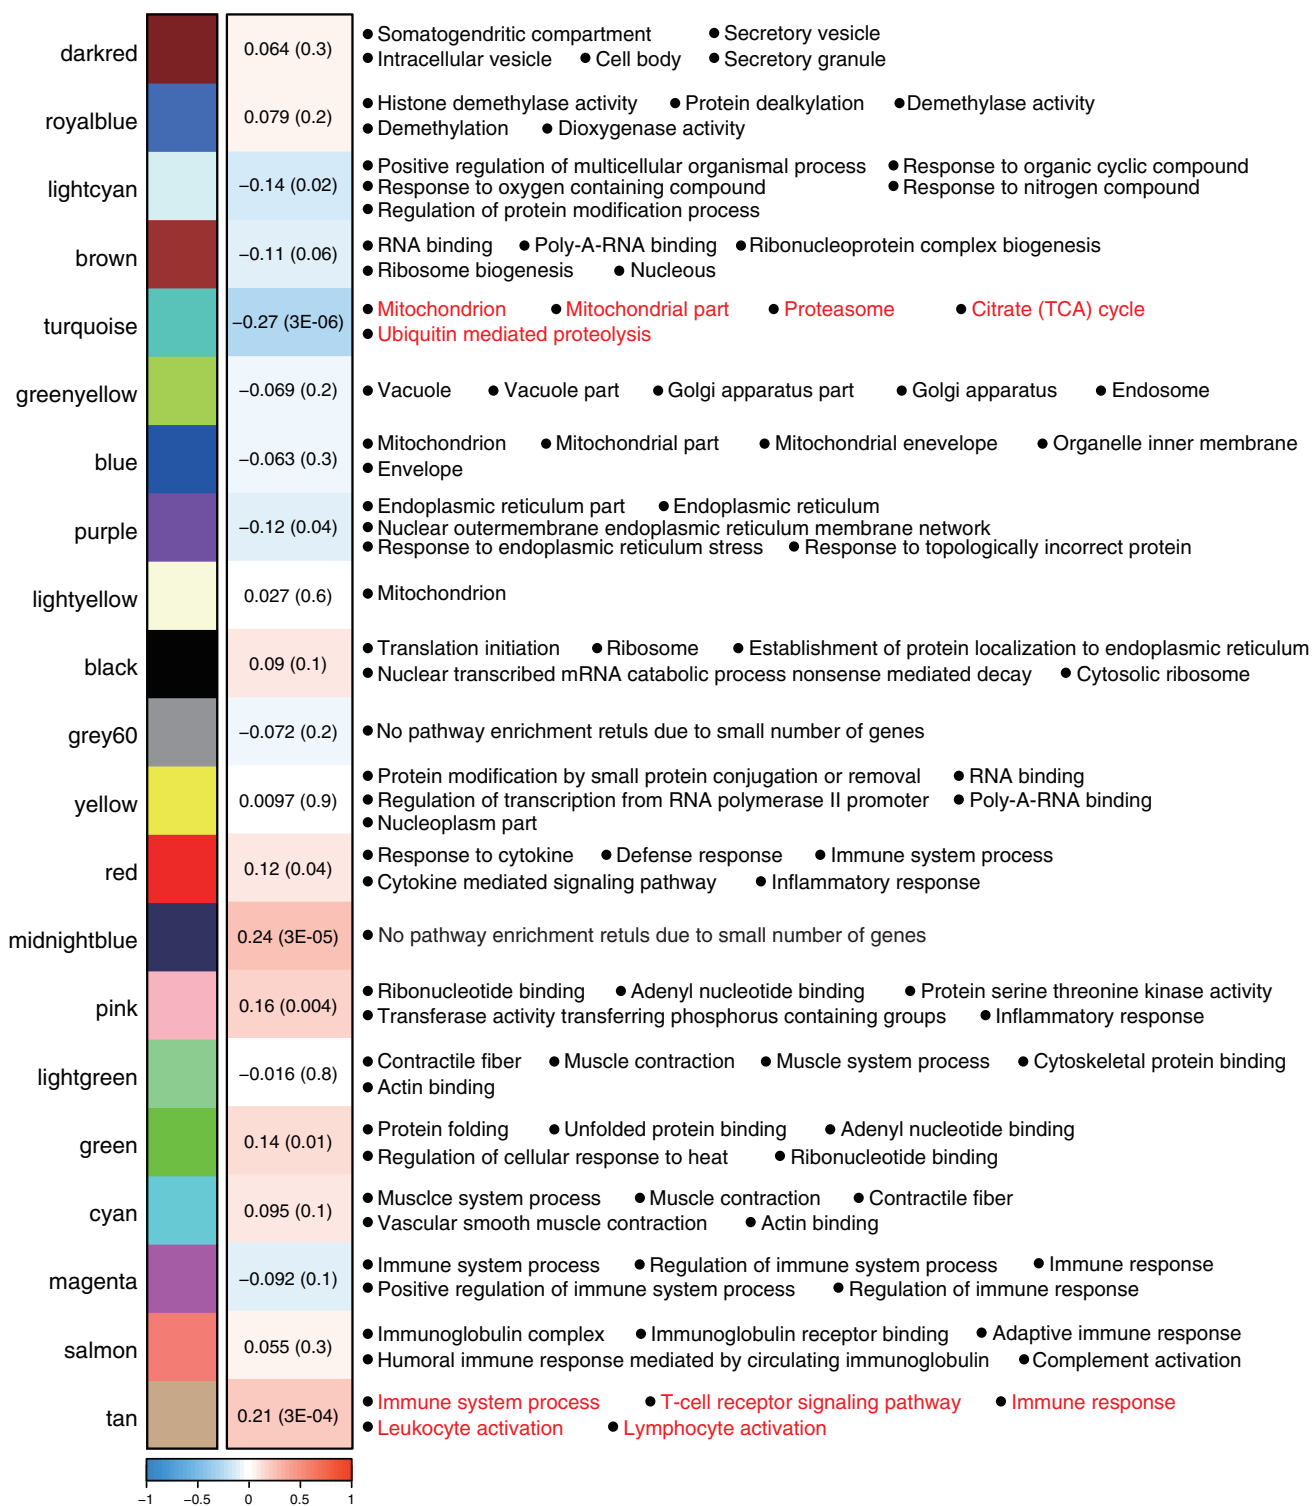

**SUPPLEMENTARY FIG. S1.** All constructed modules with pathway enrichment results. Top five the most significant GO or KEGG pathways are denoted for each module. The Pearson correlation coefficient and the correlation test  $p$ -value (in brackets) between age and the modules are presented.
