# Supplementary material for: Transcriptome Network Analysis Reveals Aging-Related Mitochondrial and Proteasomal Dysfunction and Immune Activation in Human Thyroid
Source: PubMed Central journal article supplement — Thyroid. 2018 May 1;28(5):656–66. doi: 10.1089/thy.2017.0359 (PMC5952342; doi:10.1089/thy.2017.0359), 2018-05-01
Supplement: Supp_Fig2.pdf [file Supp_Fig2.pdf]

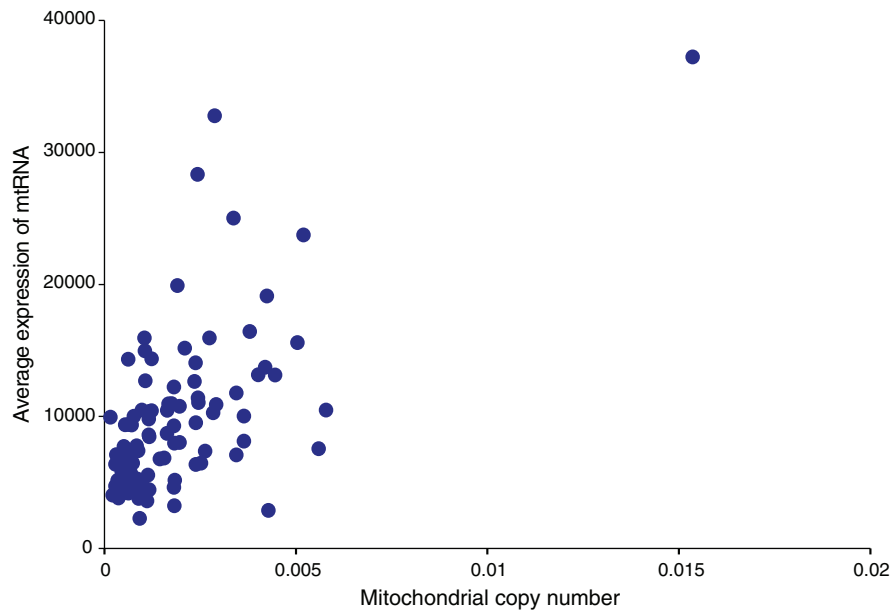

**SUPPLEMENTARY FIG. S2.** The correlation between mitochondrial copy number and average expression of mtRNA. 100 TCGA thyroid cancer whole-genome sequencing samples were used. A strong correlation between mitochondrial copy number and average expression of mtRNA were observed (Spearman's rank correlation coefficient;  $r^2=0.583$ ).
