# Supplementary material for: Transcriptome Network Analysis Reveals Aging-Related Mitochondrial and Proteasomal Dysfunction and Immune Activation in Human Thyroid
Source: PubMed Central journal article supplement — Thyroid. 2018 May 1;28(5):656–66. doi: 10.1089/thy.2017.0359 (PMC5952342; doi:10.1089/thy.2017.0359), 2018-05-01
Supplement: Supp_Fig3.pdf [file Supp_Fig3.pdf]

| <b>A</b> | <b>Gene</b>    | <b>20-39</b> | <b>40-49</b> | <b>50-59</b> | <b>60-79</b> |
|----------|----------------|--------------|--------------|--------------|--------------|
|          | <i>DLD</i>     | 75.68%       | 63.79%       | 42.34%       | 40.43%       |
|          | <i>PDHB</i>    | 64.86%       | 63.79%       | 45.05%       | 41.49%       |
|          | <i>DLAT</i>    | 72.97%       | 55.17%       | 46.85%       | 41.49%       |
|          | <i>SDHC</i>    | 64.86%       | 60.34%       | 44.14%       | 44.68%       |
|          | <i>OGDH</i>    | 67.57%       | 55.17%       | 48.65%       | 41.49%       |
|          | <i>FH</i>      | 70.27%       | 55.17%       | 45.05%       | 44.68%       |
|          | <i>IDH2</i>    | 48.65%       | 56.90%       | 50.45%       | 45.74%       |
|          | <i>SDHA</i>    | 70.27%       | 60.34%       | 45.05%       | 41.49%       |
|          | <i>MDH1</i>    | 56.76%       | 56.90%       | 47.75%       | 45.74%       |
|          | <i>ACO2</i>    | 75.68%       | 46.55%       | 48.65%       | 43.62%       |
|          | <i>PDHA1</i>   | 64.86%       | 51.72%       | 47.75%       | 45.74%       |
|          | <i>FADD</i>    | 70.27%       | 67.24%       | 51.35%       | 29.79%       |
|          | <i>GSK3B</i>   | 75.68%       | 56.90%       | 45.05%       | 41.49%       |
|          | <i>NDUFS1</i>  | 67.57%       | 60.34%       | 45.95%       | 41.49%       |
|          | <i>NDUFV3</i>  | 70.27%       | 55.17%       | 52.25%       | 36.17%       |
|          | <i>ATP5A1</i>  | 70.27%       | 55.17%       | 44.14%       | 45.74%       |
|          | <i>UQCRC1</i>  | 72.97%       | 55.17%       | 42.34%       | 46.81%       |
|          | <i>NDUFA9</i>  | 62.16%       | 58.62%       | 45.95%       | 44.68%       |
|          | <i>ATP5F1</i>  | 59.46%       | 55.17%       | 47.75%       | 45.74%       |
|          | <i>MAPK1</i>   | 62.16%       | 55.17%       | 44.14%       | 48.94%       |
|          | <i>UQCRC2</i>  | 67.57%       | 48.28%       | 43.24%       | 52.13%       |
|          | <i>NDUFB5</i>  | 59.46%       | 48.28%       | 49.55%       | 47.87%       |
|          | <i>ATP5C1</i>  | 64.86%       | 56.90%       | 44.14%       | 46.81%       |
|          | <i>ATP5B</i>   | 70.27%       | 51.72%       | 46.85%       | 44.68%       |
|          | <i>IDE</i>     | 51.35%       | 63.79%       | 46.85%       | 44.68%       |
|          | <i>EIF2AK3</i> | 54.05%       | 55.17%       | 49.55%       | 45.74%       |
|          | <i>NDUFV2</i>  | 54.05%       | 55.17%       | 41.44%       | 55.32%       |
|          | <i>PSMB2</i>   | 64.86%       | 56.90%       | 47.75%       | 42.55%       |
|          | <i>PSMD1</i>   | 70.27%       | 58.62%       | 45.05%       | 42.55%       |
|          | <i>PSMC1</i>   | 72.97%       | 63.79%       | 41.44%       | 42.55%       |
|          | <i>PSMA6</i>   | 70.27%       | 63.79%       | 43.24%       | 41.49%       |
|          | <i>PSMA5</i>   | 70.27%       | 62.07%       | 44.14%       | 41.49%       |
|          | <i>PSMD12</i>  | 67.57%       | 68.97%       | 40.54%       | 42.55%       |
|          | <i>PSMD11</i>  | 70.27%       | 65.52%       | 41.44%       | 42.55%       |
|          | <i>PSMA3</i>   | 64.86%       | 62.07%       | 45.05%       | 42.55%       |
|          | <i>PSMA1</i>   | 56.76%       | 62.07%       | 41.44%       | 50.00%       |
|          | <i>PSMC2</i>   | 70.27%       | 62.07%       | 43.24%       | 42.55%       |
|          | <i>PSMA4</i>   | 51.35%       | 60.34%       | 50.45%       | 42.55%       |
|          | <i>PSMB5</i>   | 56.76%       | 60.34%       | 45.95%       | 45.74%       |
|          | <i>PSMD2</i>   | 70.27%       | 58.62%       | 41.44%       | 46.81%       |
|          | <i>PSMD14</i>  | 59.46%       | 56.90%       | 46.85%       | 45.74%       |
|          | <i>PSMB1</i>   | 62.16%       | 55.17%       | 43.24%       | 50.00%       |
|          | <i>PSMD13</i>  | 56.76%       | 53.45%       | 44.14%       | 52.13%       |
|          | <i>PSMC4</i>   | 54.05%       | 60.34%       | 45.05%       | 47.87%       |
|          | <i>KEAP1</i>   | 70.27%       | 56.90%       | 47.75%       | 40.43%       |
|          | <i>TRIM32</i>  | 64.86%       | 65.52%       | 51.35%       | 32.98%       |
|          | <i>CUL3</i>    | 72.97%       | 55.17%       | 39.64%       | 50.00%       |
|          | <i>UBE3C</i>   | 72.97%       | 60.34%       | 45.05%       | 40.43%       |
|          | <i>UBE2J1</i>  | 78.38%       | 58.62%       | 41.44%       | 43.62%       |
|          | <i>PRPF19</i>  | 67.57%       | 51.72%       | 54.95%       | 36.17%       |
|          | <i>DDB1</i>    | 70.27%       | 58.62%       | 43.24%       | 44.68%       |
|          | <i>RFWD2</i>   | 67.57%       | 58.62%       | 42.34%       | 46.81%       |
|          | <i>UBE2K</i>   | 62.16%       | 60.34%       | 40.54%       | 50.00%       |
|          | <i>TRIP12</i>  | 64.86%       | 63.79%       | 41.44%       | 45.74%       |
|          | <i>XIAP</i>    | 67.57%       | 58.62%       | 45.95%       | 42.55%       |
|          | <i>CDC20</i>   | 59.46%       | 63.79%       | 41.44%       | 47.87%       |

| <b>B</b> | <b>Gene</b>    | <b>20-39</b> | <b>40-49</b> | <b>50-59</b> | <b>60-79</b> |
|----------|----------------|--------------|--------------|--------------|--------------|
|          | <i>ITK</i>     | 24.32%       | 34.48%       | 57.66%       | 60.64%       |
|          | <i>ZAP70</i>   | 18.92%       | 39.66%       | 58.56%       | 58.51%       |
|          | <i>CD247</i>   | 21.62%       | 44.83%       | 56.76%       | 56.38%       |
|          | <i>PTPRC</i>   | 32.43%       | 46.55%       | 56.76%       | 51.06%       |
|          | <i>PDCD1</i>   | 16.22%       | 48.28%       | 56.76%       | 56.38%       |
|          | <i>RASGRP1</i> | 32.43%       | 48.28%       | 56.76%       | 50.00%       |
|          | <i>GRAP2</i>   | 18.92%       | 41.38%       | 64.86%       | 50.00%       |
|          | <i>CD8A</i>    | 27.03%       | 39.66%       | 60.36%       | 53.19%       |
|          | <i>CD8B</i>    | 27.03%       | 46.55%       | 56.76%       | 53.19%       |
|          | <i>CARD11</i>  | 35.14%       | 48.28%       | 56.76%       | 48.94%       |
|          | <i>ICOS</i>    | 29.73%       | 41.38%       | 58.56%       | 53.19%       |
|          | <i>LCK</i>     | 32.43%       | 41.38%       | 54.95%       | 56.38%       |
|          | <i>CTLA4</i>   | 32.43%       | 41.38%       | 54.95%       | 56.38%       |
|          | <i>CD28</i>    | 35.14%       | 48.28%       | 59.46%       | 45.74%       |
|          | <i>CD3D</i>    | 43.24%       | 50.00%       | 53.15%       | 48.94%       |
|          | <i>FASLG</i>   | 29.73%       | 43.10%       | 60.36%       | 50.00%       |

**SUPPLEMENTARY FIG. S3.** Proportion of samples which have higher normalized expression value than median of each gene was colored in orange. **(A)** Mitochondrial genes and proteasome genes. **(B)** Immune response genes.
