# Supplementary material for: Transcriptome Network Analysis Reveals Aging-Related Mitochondrial and Proteasomal Dysfunction and Immune Activation in Human Thyroid
Source: PubMed Central journal article supplement — Thyroid. 2018 May 1;28(5):656–66. doi: 10.1089/thy.2017.0359 (PMC5952342; doi:10.1089/thy.2017.0359), 2018-05-01
Supplement: Supp_Fig4.pdf [file Supp_Fig4.pdf]

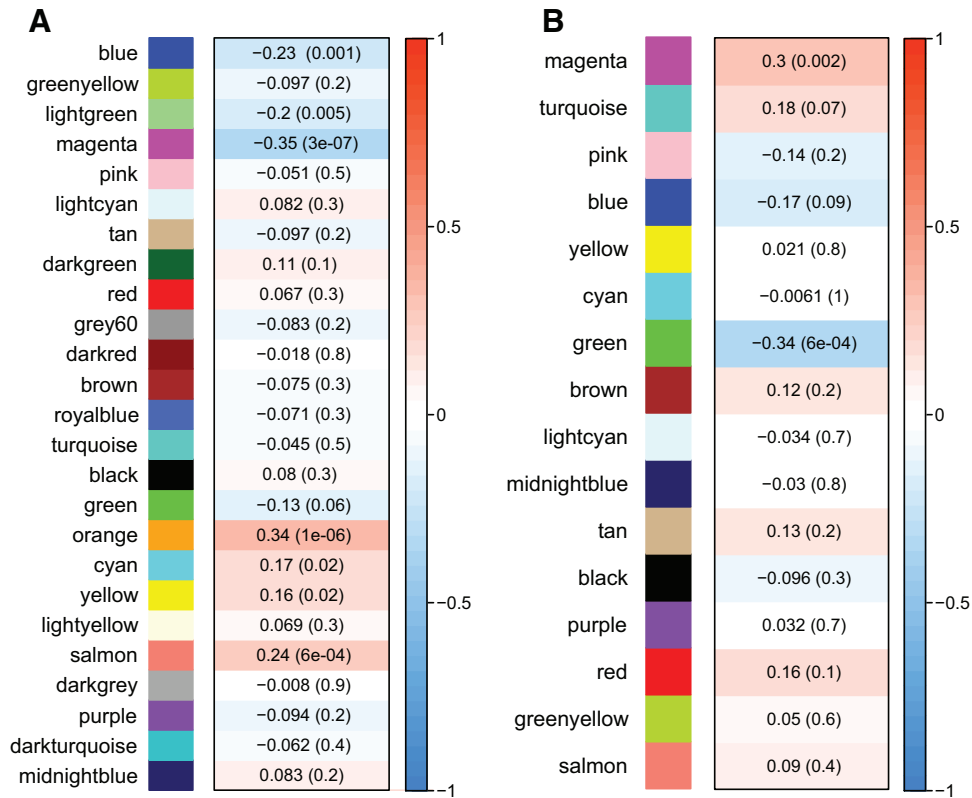

**SUPPLEMENTARY FIG. S4.** Age-related gene co-expression analysis of (A) male and (B) female GTEx subjects. Relationship between constructed modules and age is displayed. The numbers in the bracket indicate the significance.
