# Supplementary material for: Transcriptome Network Analysis Reveals Aging-Related Mitochondrial and Proteasomal Dysfunction and Immune Activation in Human Thyroid
Source: PubMed Central journal article supplement — Thyroid. 2018 May 1;28(5):656–66. doi: 10.1089/thy.2017.0359 (PMC5952342; doi:10.1089/thy.2017.0359), 2018-05-01
Supplement: Supp_Fig5.pdf [file Supp_Fig5.pdf]

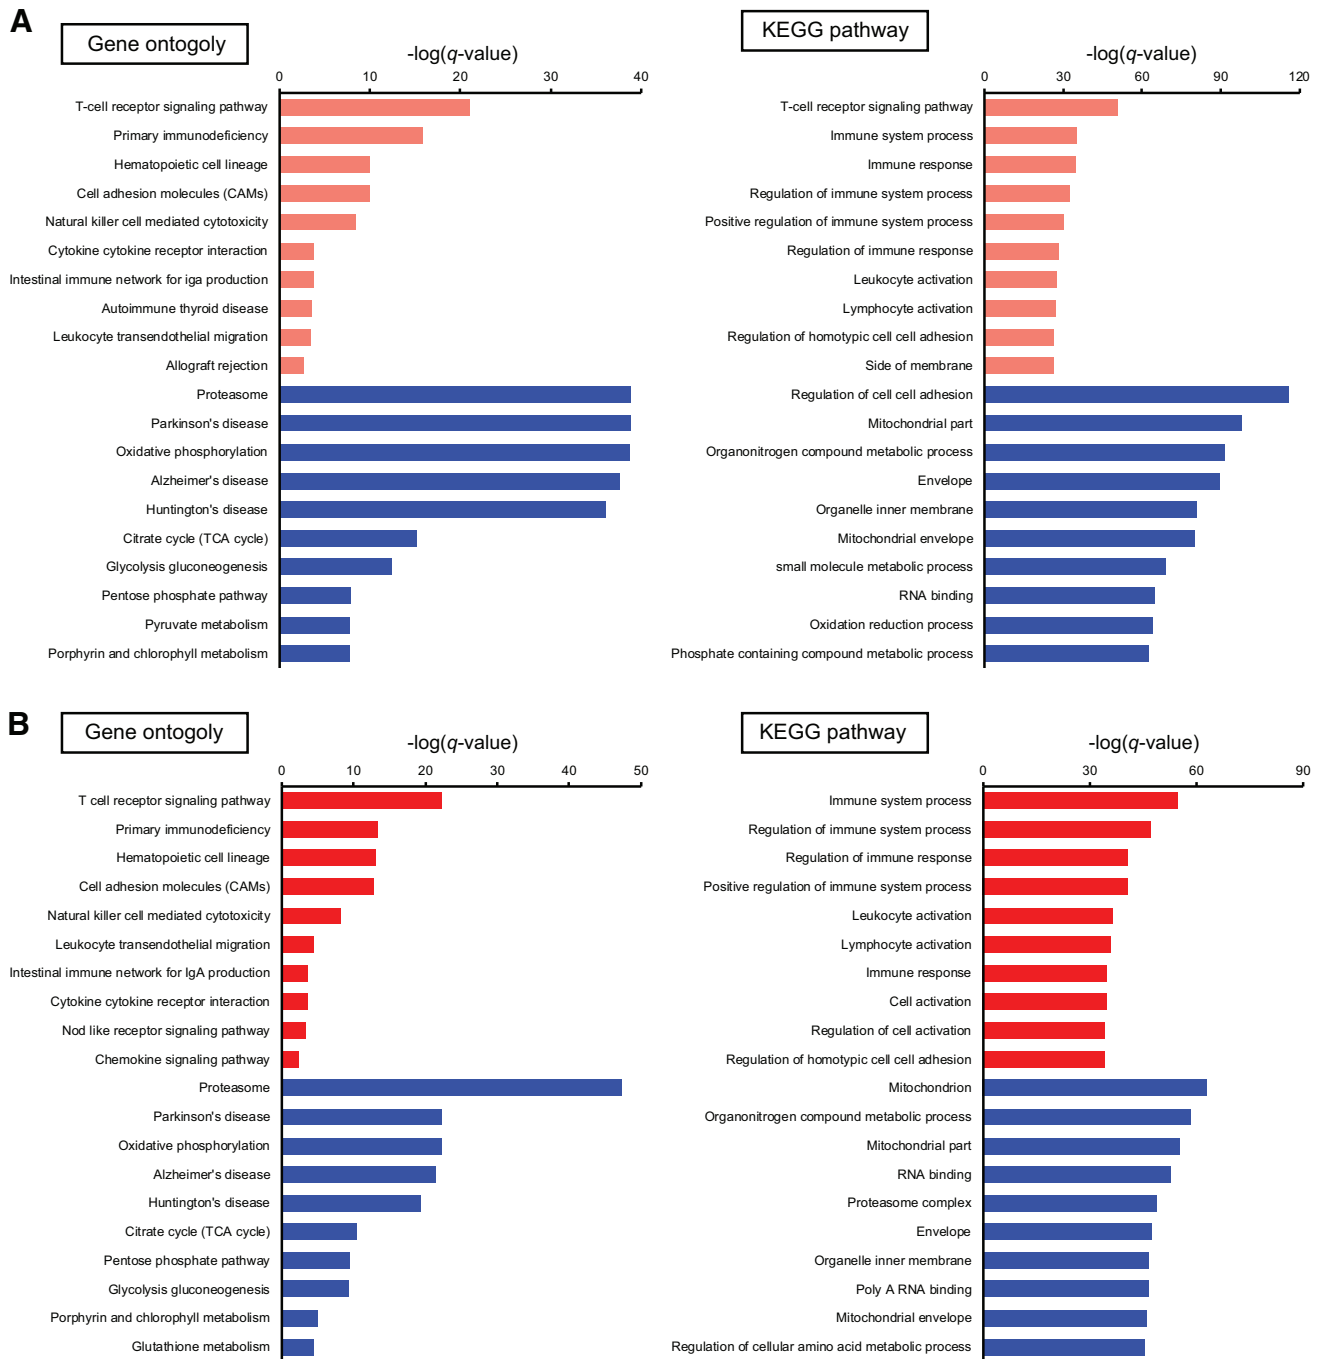

**SUPPLEMENTARY FIG. S5.** Pathway enrichment analysis of age-related genes from co-expression analysis. (A) Male and (B) female samples were subjected to the analysis separately. The enrichment analysis was conducted with mitochondrial gene module (salmon and blue, in male and female respectively) and immune response gene module (blue and red, in male and female respectively).
