# Supplementary material for: Transcriptome Network Analysis Reveals Aging-Related Mitochondrial and Proteasomal Dysfunction and Immune Activation in Human Thyroid
Source: PubMed Central journal article supplement — Thyroid. 2018 May 1;28(5):656–66. doi: 10.1089/thy.2017.0359 (PMC5952342; doi:10.1089/thy.2017.0359), 2018-05-01
Supplement: Supp_Fig6.pdf [file Supp_Fig6.pdf]

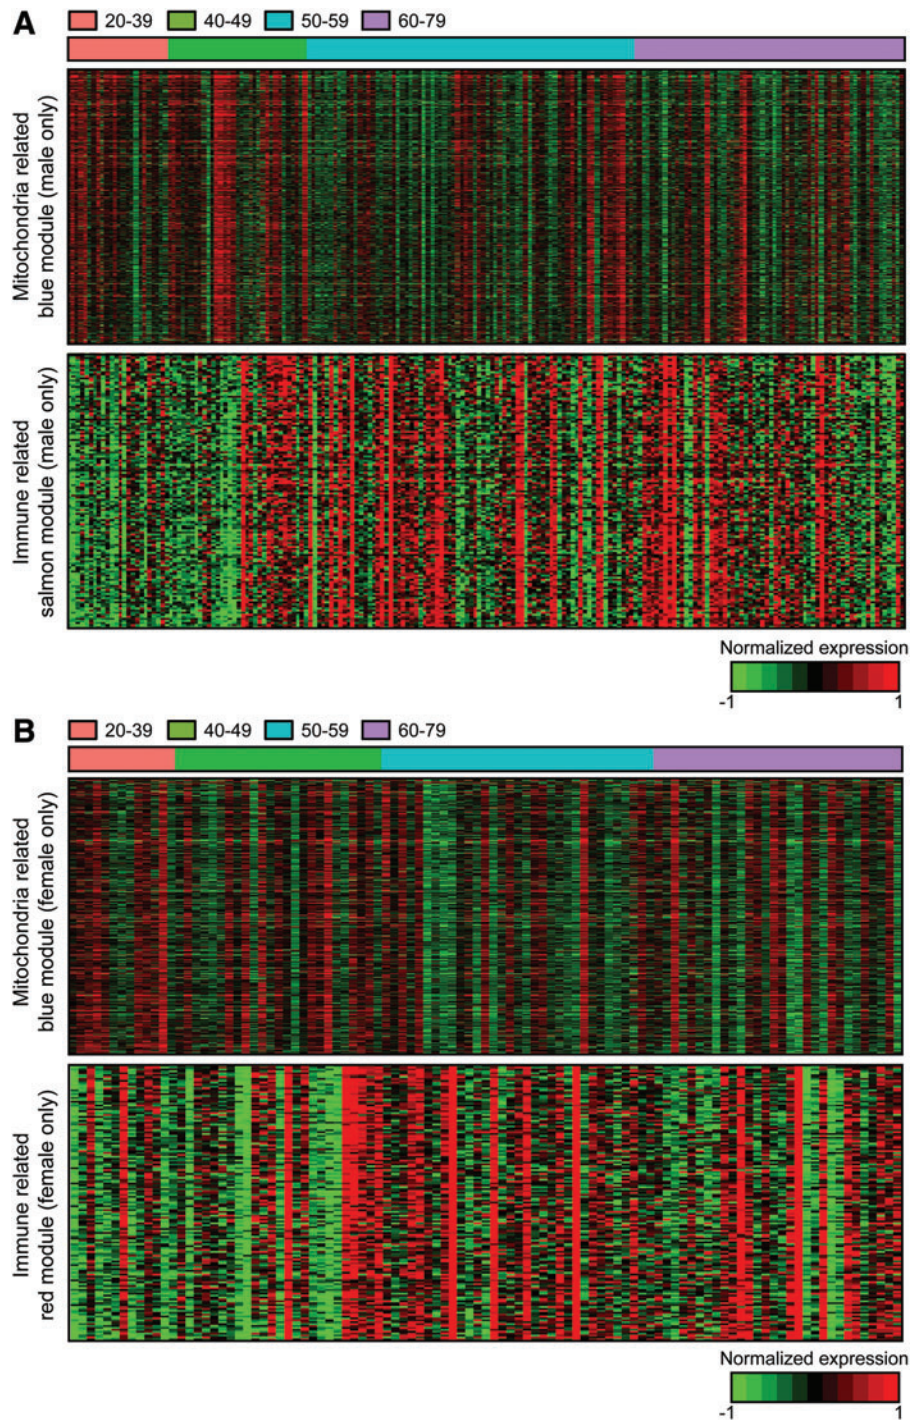

**SUPPLEMENTARY FIG. S6.** Age-related gene co-expression analysis of (A) male and (B) female GTEx subjects. Expression pattern of mitochondrial related genes are immune response related genes are shown. Similar gene expression pattern was exhibited when compared to previously identified age-related modules in all GTEx subjects.
